# Supplementary material for: An ionic liquid containing arsonium cation
Source: Royal Society of Chemistry journal article supplement (doi:10.1039/d4cc05072j), 2024-01-01
Supplement: d4cc05072j1.pdf [file d4cc05072j1.pdf]

**Contents:**

1. Materials
2. Measurements
3. Thermal properties
4. Ionic conductivity
5. Diffusion coefficient
6. Alkali-resistance test
7. Syntheses
8. NMR spectra
9. References

## 1. Materials

Tetrahydrofuran (THF) and dichloromethane ( $\text{CH}_2\text{Cl}_2$ ) were purchased from Nacalai Tesque, Inc. Lithium bis(trifluoromethanesulfonyl)imide (LiTFSI), potassium hydroxide (KOH), and chloroform-*d* ( $\text{CDCl}_3$ ) were purchased from FUJIFILM Wako Pure Chemical, Co. 1,3,5-Tri-*tert*-butylbenzene was purchased from Tokyo Chemical Industry Co., Ltd. Methanol-*d*<sub>3</sub> ( $\text{CD}_3\text{OH}$ ) was purchased from ISOTECH. Trihexylphosphine<sup>[1]</sup> and trihexylarsine<sup>[2]</sup> were prepared according to the literature.

## 2. Measurement

$^1\text{H}$  (400 MHz),  $^{13}\text{C}\{^1\text{H}\}$  (100 MHz),  $^{19}\text{F}$ -NMR (376 MHz) and  $^{31}\text{P}\{^1\text{H}\}$ -NMR (162 MHz) NMR spectra were recorded on a Bruker AVANCE III 400 NMR spectrometer or a JEOL ECZ-400S NMR spectrometer using  $\text{Me}_4\text{Si}$  (TMS) as an internal standard. The following abbreviations are used; s: singlet, d: doublet, t: triplet, q: quintet, m: multiplet.

## 3. Thermal properties

The sample was placed in an open-type aluminum pan and accurately weighed. Measurements were carried out at 25–500 °C using a thermogravimetric–differential thermal analysis (TG–DTA) 7200 instrument (Hitachi High-Tech). The  $\text{N}_2$  gas flow rate was 200  $\text{mL min}^{-1}$  and the heating rate was 10 °C  $\text{min}^{-1}$ . The phase transition behavior was investigated via differential scanning calorimetry (DSC) using a DSC7020 system (Hitachi High-Tech) at a scanning rate of 10 °C  $\text{min}^{-1}$ . The samples were sealed in aluminum pans in an argon-filled glove box. The reported data were obtained from the second heating scan. The measurement temperature ranged from –150 to 100 °C.

## 4. Ionic conductivity

Impedance measurements were carried out using a locally designed cell made from two platinum electrodes. The cell constants were calculated with a 0.01  $\text{mol L}^{-1}$  KCl aqueous solution. The ionic conductivity values were obtained by measuring the complex impedance between 5 Hz to 1 MHz (applied voltage: 10 mV) using an impedance analyzer, VSP-300 (BioLogic) over the temperature range of –30 to 100 °C. The temperatures of the samples were controlled by placing the measurement cell in a thermostatic chamber (SU-262, ESPEC Corp.).

## 5. Diffusion coefficient

Pulsed-field gradient NMR (PFG-NMR) diffusion measurements were performed on a Bruker 400 MHz UltraShield spectrometer with an Avance III console utilizing a Diff30 diffusion probe. The various constituents of the samples were measured using the  $^1\text{H}$  nuclei for the onium cations and  $^{19}\text{F}$  nuclei for the TFSA anion. The experiments were performed using the stimulated spin-echo (STE) pulse sequence by varying the gradient in eight steps up to the maximum gradient strength. This data was fit to the Stejskal-Tanner diffusion Eq. (1) using the nonlinear least-squares method. Samples were packed and sealed in 5 mm NMR tubes in an argon gas atmosphere. The measurement temperature ranged from 30 to 100 °C.

$$A = A_0 \exp[-(\gamma\delta G)^2(\Delta - \delta/3)D] \quad (1)$$

where  $A_0$  is the signal area without a gradient,  $\gamma$  is the gyromagnetic ratio of the nuclei under study,  $G$  is the gradient strength,  $\Delta$  is the delay between the two gradients,  $\delta$  is the duration of one of the gradient pulses, and  $D$  is the diffusion coefficient. For each measurement, the gradient pulse duration and diffusion time was typically 1 ms, respectively, and the gradient strength ( $G = 350 - 1700 \text{ G cm}^{-1}$ ) was optimized according to the diffusion coefficients.

## 6. Alkali-resistance test

The salt (**1**·TFSA or **2**·TFSA, approximately 15 mg) was dissolved in a 1 M KOH/methanol ( $\text{CD}_3\text{OH}/\text{CH}_3\text{OH} = 1/9 \text{ v/v}$ ) solution (0.6 ml) containing a small amount of 1,3,5-tri-*tert*-butylbenzene as an internal standard and was added to an NMR tube. After the NMR tube was flame-sealed, the initial amount of the cation (**1** or **2**) was determined by the integration of a signal (2.32 ppm for **1** and 2.15 ppm for **2**) relative to that of a signal at 7.17 ppm of 1,3,5-tri-*tert*-butylbenzene in a  $^1\text{H}$ -NMR spectrum. In the  $^1\text{H}$  NMR measurement, the  $-\text{CH}_3$  signal in  $\text{CH}_3\text{OH}$  (3.32 ppm) was suppressed by the presaturation technique with a 5 s presaturation delay. The NMR sample was then heated in an oil bath at 80 °C. The residual amount of the cation was determined by  $^1\text{H}$ -NMR spectroscopy over a period of 8 weeks.

## 7. Syntheses

### *Synthesis of 1-1*

To a THF solution (10 mL) of trihexylarsine (1.240 g, 3.75 mmol) was added *ca.* 2 eq. of MeI (1.099 g, 7.74 mmol). The mixture was stirred at 60 °C overnight. The volatile was removed *in vacuo*. The residue was washed with hexane. The product was obtained as a

yellow viscous liquid in 66% (1.168 g, 2.48 mmol). The methylation was checked by <sup>1</sup>H-NMR. <sup>1</sup>H-NMR (CDCl<sub>3</sub>, 400 MHz): δ 2.47–2.32 (m, 6H), 1.63–1.46 (m, 12H), 1.38–1.22 (m, 15H), 0.92–0.86 (m, 9H) ppm.

#### *Synthesis of 2·I*

To a THF (5 mL) solution of trihexylphosphine (0.392 g, 1.37 mmol) was added *ca.* 2 eq. of MeI (0.385 g, 2.71 mmol). The mixture was stirred at 25 °C overnight. The volatile was removed *in vacuo*. The residue was washed with hexane. The product was obtained as a yellow viscous liquid in 89% (0.522 g, 1.22 mmol). Methylation was checked by <sup>1</sup>H-NMR. <sup>1</sup>H-NMR (CDCl<sub>3</sub>, 400 MHz): δ 2.36–2.31 (m, 6H), 1.62–1.54 (m, 6H), 1.48–1.41 (m, 6H), 1.38–1.25 (m, 15H), 0.91–0.87 (m, 9H) ppm.

#### *Synthesis of 1·TFSA*

To a THF solution (10 mL) of 1·I (1.17 g, 2.48 mmol) was added 1.05 eq. of LiTFSA (0.747 g, 2.60 mmol). The mixture was stirred at 25 °C overnight. The volatile was removed *in vacuo*. The residue was washed with water four times to eliminate remaining lithium salts. The viscous liquid was dried *in vacuo* at 100 °C for 5 h and settled in the glovebox for one week to remove water. The product was obtained quantitatively as a yellow viscous liquid. We attempted to remove the yellow coloration several times using sodium thiosulfate, but slight coloration still remained. <sup>1</sup>H-NMR (CDCl<sub>3</sub>, 400 MHz): δ 2.40–2.36 (m, 6H), 1.85 (s, 3H), 1.61–1.55 (m, 6H), 1.47–1.43 (m, 6H), 1.34–1.29 (m, 12H), 0.92–0.88 (m, 9H) ppm. <sup>13</sup>C{<sup>1</sup>H}-NMR (CDCl<sub>3</sub>, 100 MHz): δ 41.86, 31.84, 30.86, 30.26, 29.89, 26.94, 23.85, 22.85, 22.61, 22.27, 22.02, 14.05, 13.81, 2.84 ppm. <sup>19</sup>F-NMR (CDCl<sub>3</sub>, 376 MHz): δ –80.03 ppm.

#### *Synthesis of 2·TFSA*

To a THF solution (6 mL) of 2·I (0.358 g, 0.838 mmol) was added 1.05 eq. of LiTFSA (0.260 g, 0.905 mmol). The mixture was stirred at 25 °C overnight. The volatile was removed *in vacuo*. The residue was washed with water four times to eliminate remaining lithium salts. The viscous liquid was dried *in vacuo* at 100 °C for 5 h and settled in the glovebox for one week to remove water. The product was obtained quantitatively as a yellow viscous liquid. We attempted to remove the yellow coloration several times using sodium thiosulfate, but slight coloration still remained. <sup>1</sup>H-NMR (CDCl<sub>3</sub>, 400 MHz): δ 2.15–2.09 (m, 6H), 1.79–1.77 (d, 3H), 1.52–1.47 (m, 12H), 1.32–1.31 (m, 12H), 0.91–0.88 (m, 9H) ppm. <sup>13</sup>C{<sup>1</sup>H}-NMR (CDCl<sub>3</sub>, 100 MHz): δ 30.87, 30.16, 30.04, 22.25, 21.42,

21.39, 20.33, 19.94, 13.81, 4.23, 3.81 ppm.  $^{19}\text{F}$ -NMR ( $\text{CDCl}_3$ , 376 MHz):  $\delta$  -78.87 ppm.  
 $^{31}\text{P}\{^1\text{H}\}$ -NMR ( $\text{CDCl}_3$ , 162 MHz):  $\delta$  31.33 ppm.

*Trials for the synthesis of antimony-containing IL.*

$\text{SbCl}_3$  was added dropwise to a THF solution (40 mL) of hexylmagnesium bromide, which was prepared from  $\text{C}_6\text{H}_{13}\text{Br}$  (3.97 g, 24 mmol) and magnesium (1.16 g, excess), at  $0\text{ }^\circ\text{C}$  under  $\text{N}_2$  atmosphere. The reaction mixture was warmed to  $25\text{ }^\circ\text{C}$ , and stirred overnight. The volatiles were removed *in vacuo*, and the obtained liquid product was filtrated to remove the inorganic components. The synthesis of  $\text{Sb}(\text{C}_6\text{H}_{13})_3$  was confirmed by NMR.<sup>[3]</sup> The filtrated  $\text{Sb}(\text{C}_6\text{H}_{13})_3$  (0.36 g, 0.95 mmol) was dissolved by THF (20 mL) and  $\text{MeI}$  (0.28 g, 1.95 mmol) was added. The reaction solution was stirred at  $60\text{ }^\circ\text{C}$  overnight under  $\text{N}_2$  atmosphere. After the reaction, the solution was exposed to air, and then insoluble precipitates generated. Even after filtration, the precipitates further generated again. Thus we concluded that the isolation of  $[\text{Sb}(\text{C}_6\text{H}_{13})_3\text{CH}_3]\text{I}$  is difficult due to the instability.

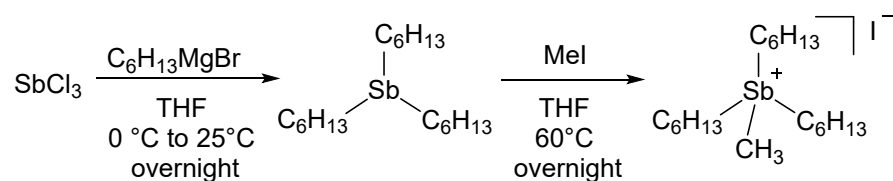

**Scheme S1.** Synthesis of  $[\text{Sb}(\text{C}_6\text{H}_{13})_3\text{CH}_3]\text{I}$ .

## 8. NMR spectra

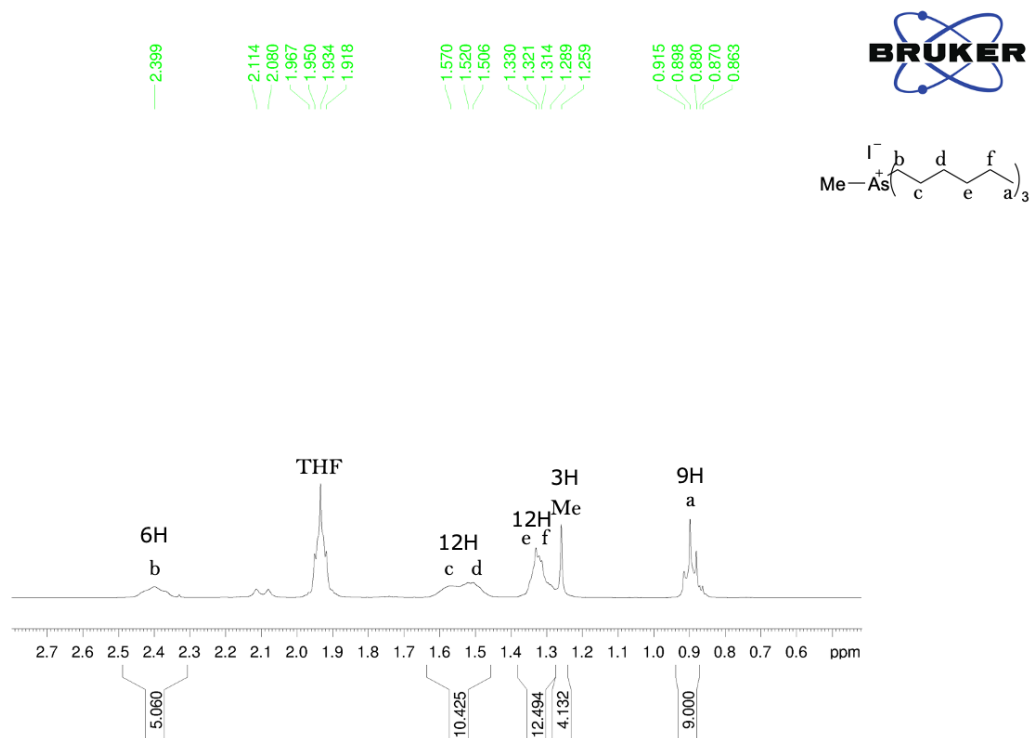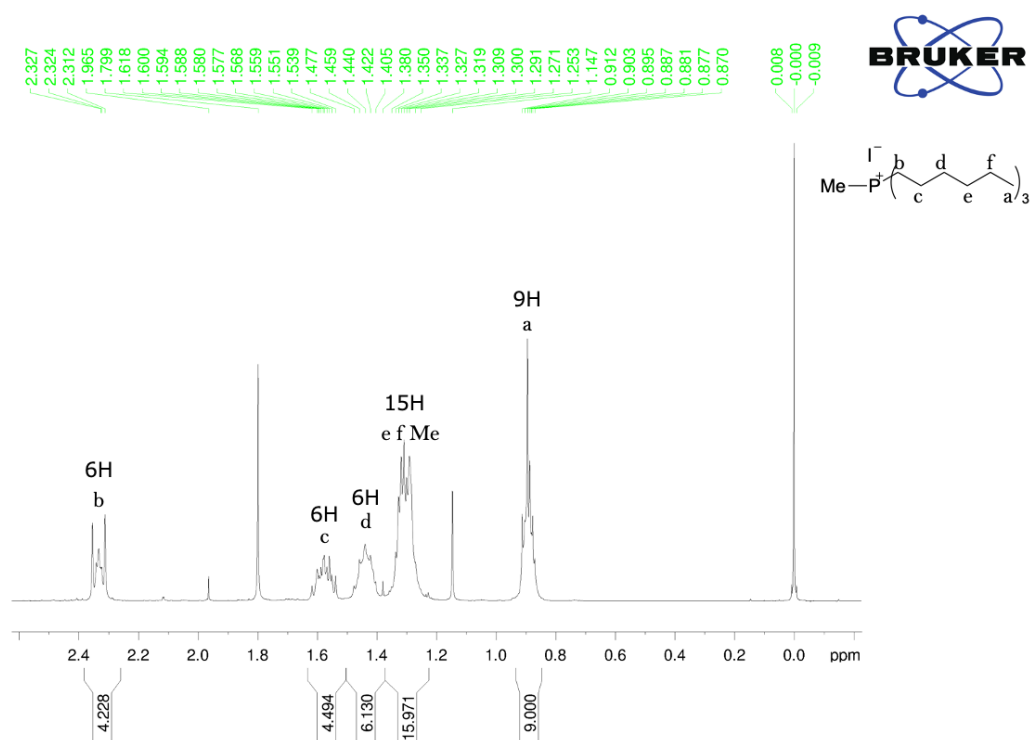

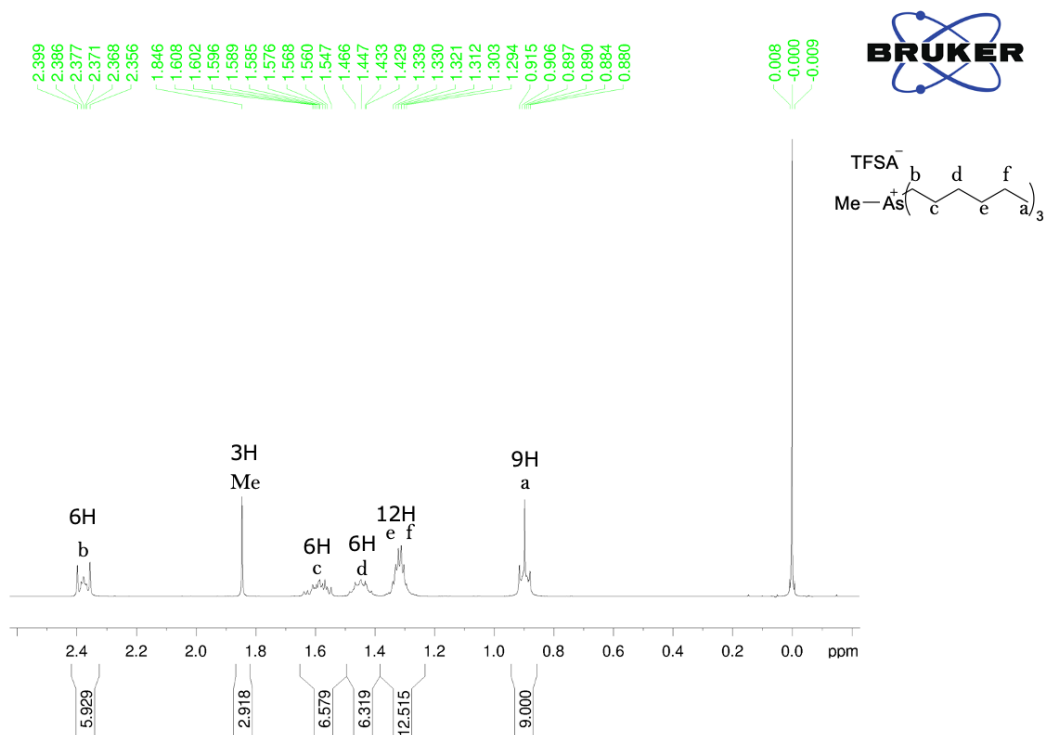

Figure S3.  $^1\text{H}$ -NMR spectrum (400 MHz) of **1**·TFSA in  $\text{CDCl}_3$ .

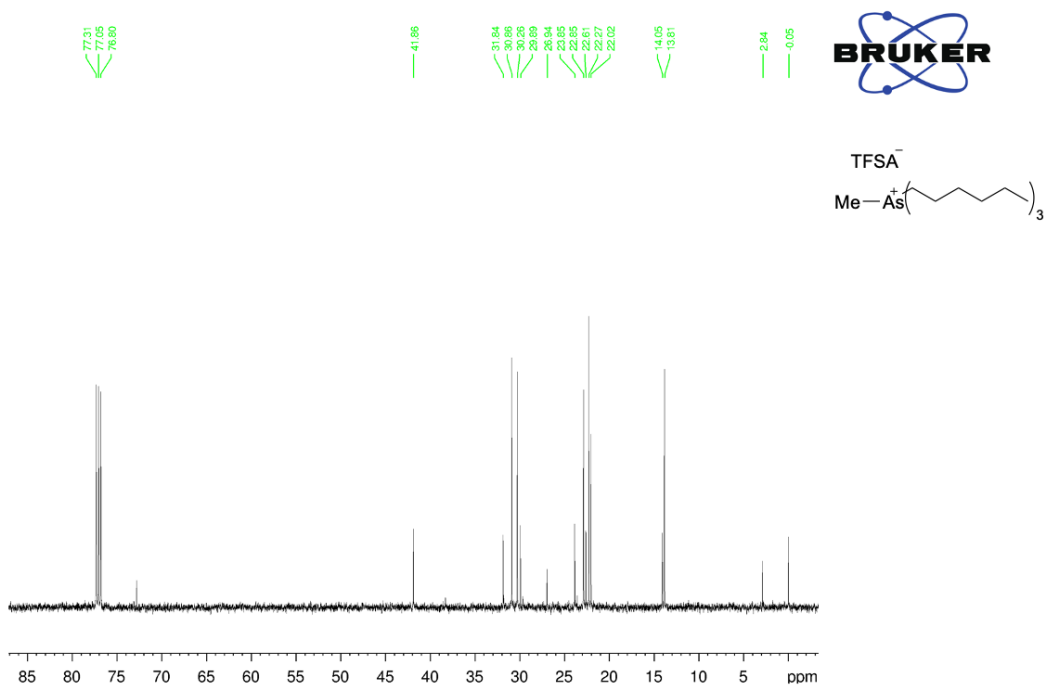

Figure S4.  $^{13}\text{C}$ -NMR spectrum (100 MHz) of **1**·TFSA in  $\text{CDCl}_3$ .

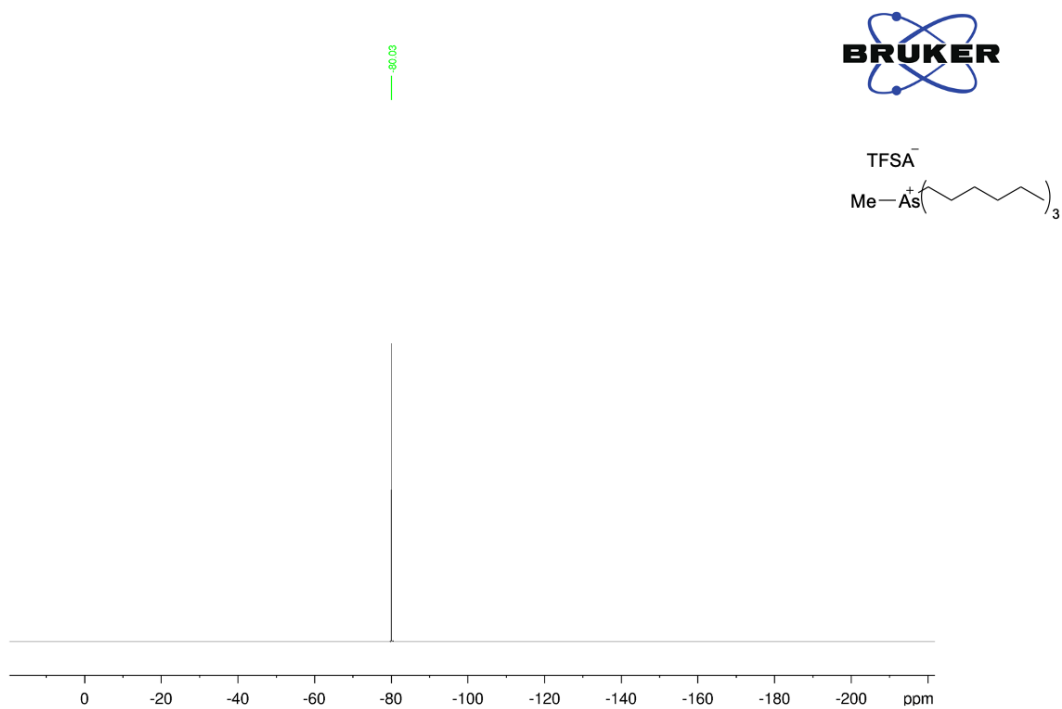

Figure S5.  $^{19}\text{F}$ -NMR spectrum (400 MHz) of  $1 \cdot \text{TFSA}$  in  $\text{CDCl}_3$ .

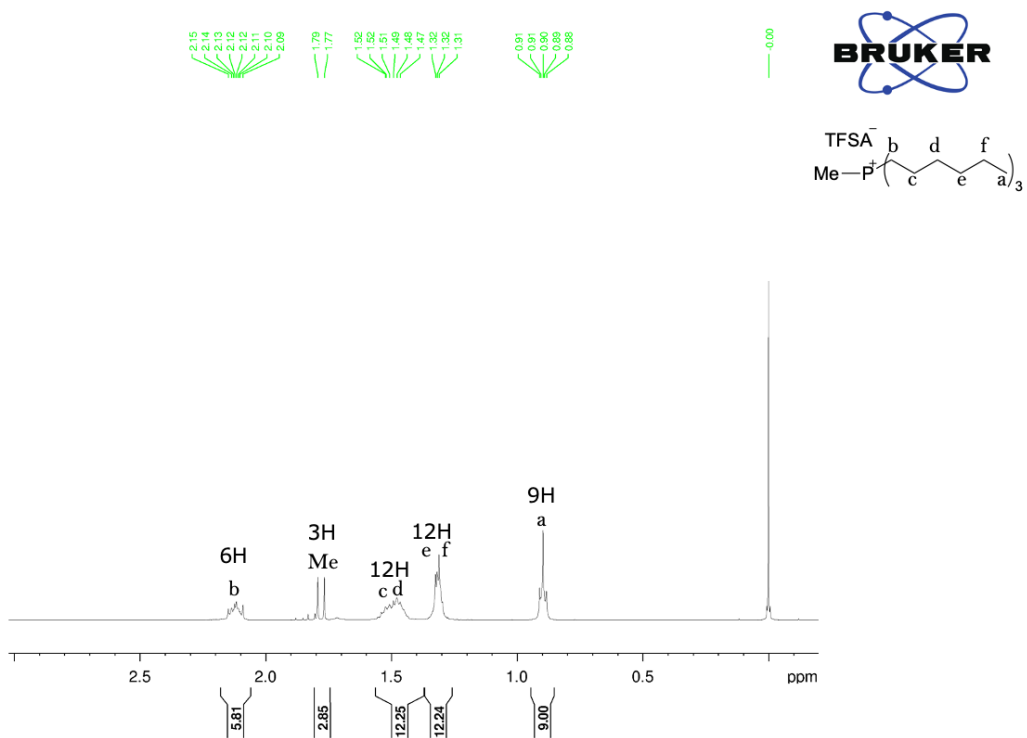

Figure S6.  $^1\text{H}$ -NMR spectrum (400 MHz) of  $2 \cdot \text{TFSA}$  in  $\text{CDCl}_3$ .



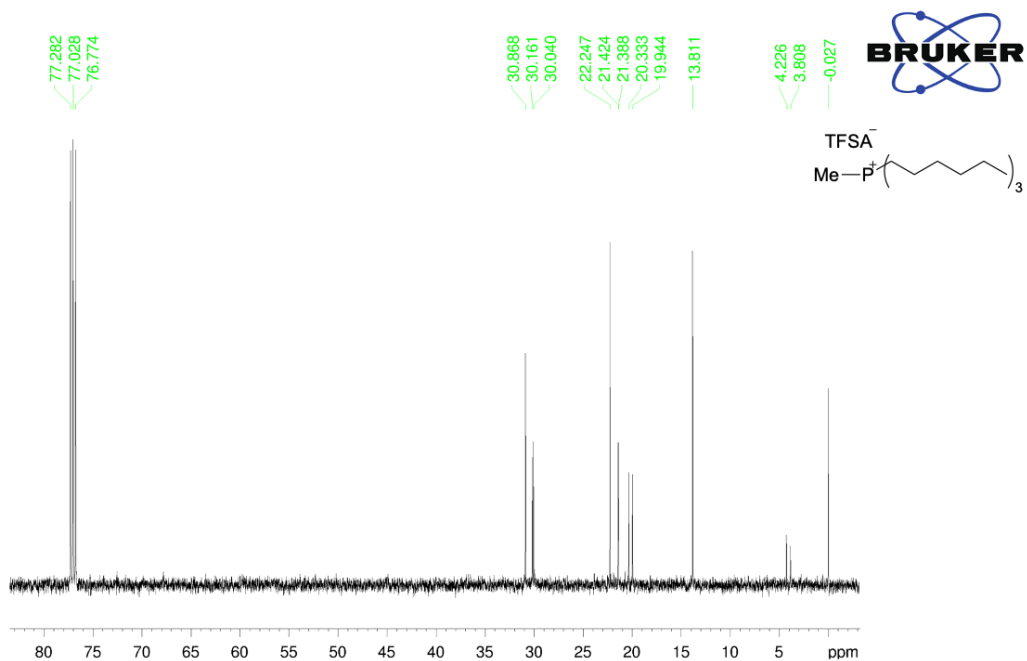

**Figure S7.** <sup>13</sup>C-NMR spectrum (100 MHz) of 2·TFSA in CDCl<sub>3</sub>.

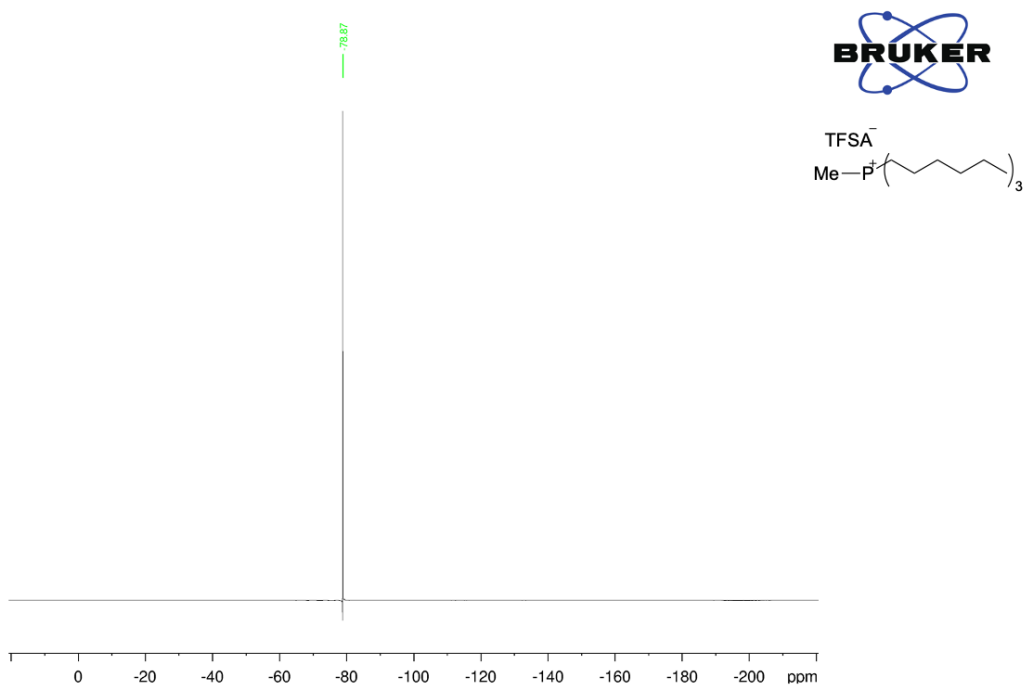

**Figure S8.** <sup>19</sup>F-NMR spectrum (376 MHz) of 2·TFSA in CDCl<sub>3</sub>.

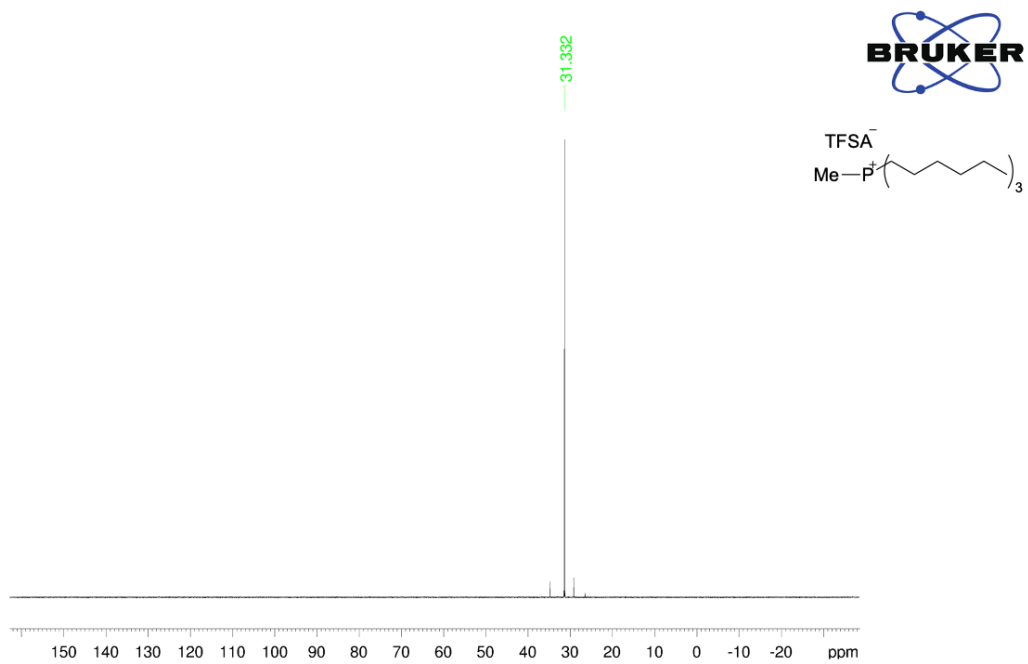

**Figure S9.**  $^{31}\text{P}$ -NMR spectrum (162 MHz) of **2**·TFSA in  $\text{CDCl}_3$ .

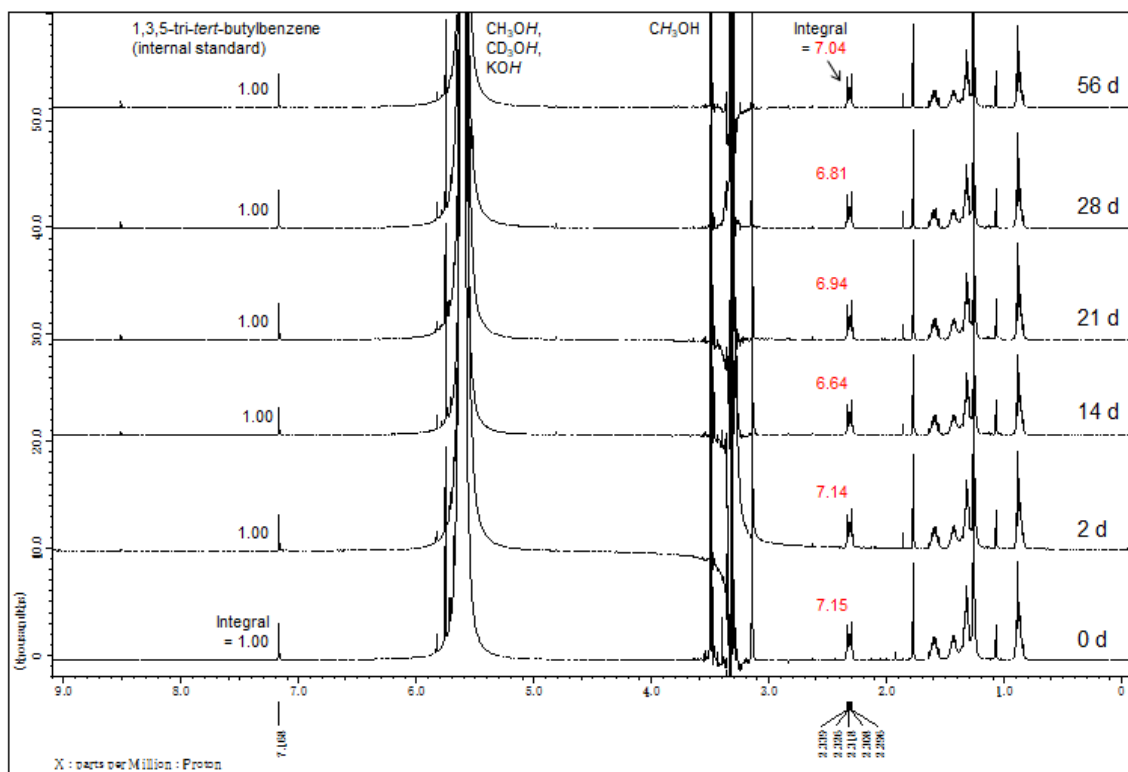

**Figure S10.** <sup>1</sup>H-NMR spectra of **1**·TFSA in the presence of 1 M KOH in CD<sub>3</sub>OH/CH<sub>3</sub>OH (9/1). The alkali resistance test was performed at 80 °C.

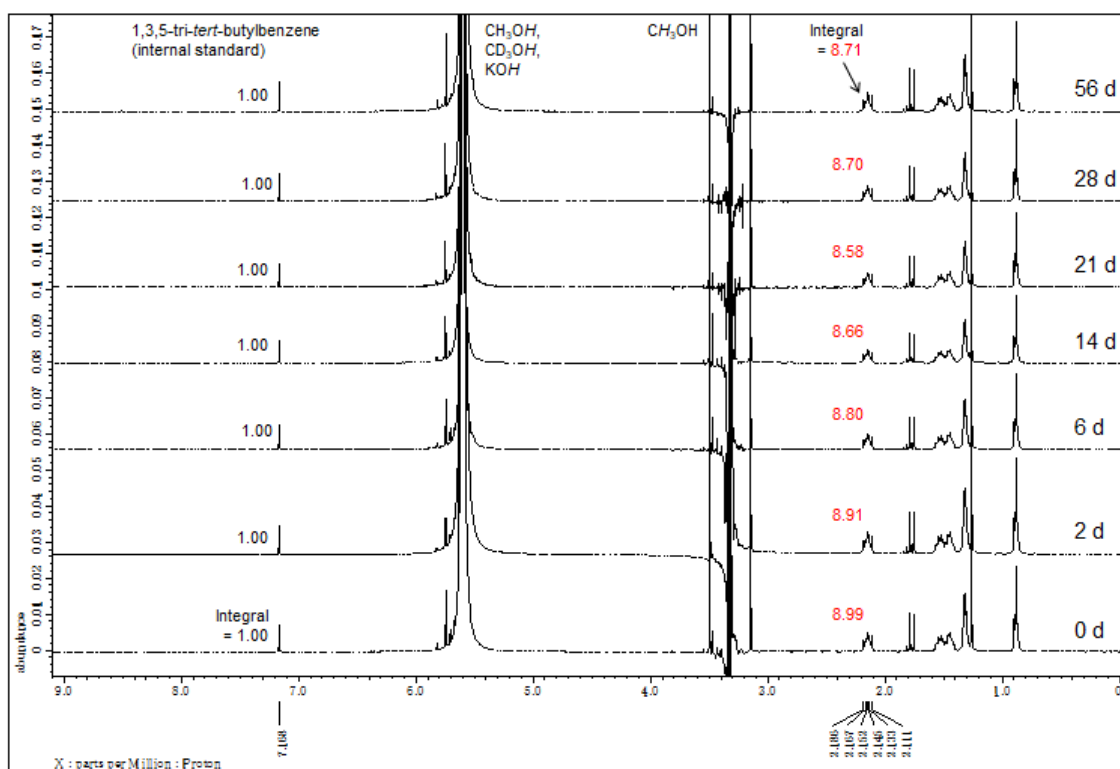

**Figure S11.**  $^1\text{H-NMR}$  spectra of **2**·TFSA in the presence of 1 M KOH in  $\text{CD}_3\text{OH}/\text{CH}_3\text{OH}$  (9/1). The alkali resistance test was performed at  $80\text{ }^\circ\text{C}$ .

## 9. References

- [1] M. Selva, M. Fabris, V. Lucchini, A. Perosa and M. Noe, *Org. Biomol. Chem.*, 2010, **8**, 5187–5198.
- [2] J. Yukiyasu, R. Inaba, T. Yumura, H. Imoto and K. Naka, *Org. Chem. Front.*, 2022, **9**, 6786–6794.
- [3] W. J. C. Dyke, W. C. Davies and W. J. Jones, *J. Chem. Soc.*, 1930, 463–467.
